# Supplementary material
Source: publisher figshare collection journal article supplement (https://tandf.figshare.com/ndownloader/files/17485043)
Supplement: Supplementary file 1 [file 17485043]

Supporting Information

for

Application of the pKa rule to synthesize salts of bezafibrate

Jesus Daniel Loya, Selena J. Li, Daniel K. Unruh, and Kristin M. Hutchins*

Department of Chemistry & Biochemistry, Texas Tech University, 1204 Boston Avenue, Lubbock, TX 79409, USA.

*Author email address: [kristin.hutchins@ttu.edu](mailto:kristin.hutchins@ttu.edu)

Materials and Synthesis of the Salts Page S1

X-ray Diffraction Information and Data Tables Page S2-S3

Single-Crystal Structures Showing Thermal Ellipsoids Page S4-S6

NMR Spectra of the Crystals Page S7-S9

FT-IR Spectra Page S10-S15

Powder X-ray Diffraction Data Page S16-S18

Melting Points of the Crystals Page S19

1. **Materials and Synthesis of the Salts**

**Materials**

Bezafibrate (**BEZA**) was purchased from Alfa Aesar (Ward Hill, MA, USA). 3-Aminopyridine (**3-AP**) and 4-aminopyridine (**4-AP**) were purchased from Acros Organics (New Jersey, USA). 4-(Methylamino)pyridine (**4-MetAP**) and nitromethane were purchased from Oakwood Chemical (Estill, SC, USA). 2-Aminopyridine (**2-AP**) was purchased from Tokyo Chemical Industry (Portland, OR, USA). Lastly, acetone and ethyl acetate were purchased from Fisher Scientific (Lenexa, KS, USA). All chemicals and solvents were used as received.

**Synthesis of BEZA**·**2-AP**:

Crystals of **BEZA**·**2-AP** were synthesized by dissolving **BEZA** (20 mg, 0.055 mmol) and **2-AP** (5 mg, 0.055 mmol) in acetone or ethyl acetate. Slow evaporation of the solution was allowed for a period of 2-3 days until single crystals were formed that were suitable for X-ray diffraction.

**Synthesis of BEZA**·**3-AP**:

Crystals of **BEZA**·**3-AP** were synthesized by dissolving **BEZA** (20 mg, 0.055 mmol) and **3-AP** (5 mg, 0.055 mmol) in nitromethane. Slow evaporation of the solution was allowed for a period of 2-3 days until single crystals were formed that were suitable for X-ray diffraction.

**Synthesis of BEZA**·**4-AP**:

Crystals of **BEZA**·**4-AP** were synthesized by dissolving **BEZA** (20 mg, 0.055 mmol) and **4-AP** (5 mg, 0.055 mmol) in nitromethane. Slow evaporation of the solution was allowed for a period of 2-3 days until single crystals were formed that were suitable for X-ray diffraction.

**Synthesis of BEZA**·**4-MetAP**:

Crystals of **BEZA**·**4-MetAP** were synthesized by dissolving **BEZA** (20 mg, 0.055 mmol) and **4-MetAP** (5 mg, 0.055 mmol) in nitromethane. Slow evaporation of the solution was allowed for a period of 2-3 days until single crystals were formed that were suitable for X-ray diffraction.

**Liquid-assisted milling experiments**

Salts of **BEZA** with **2-AP**, **2-AP**·EtOAc, **3-AP**, **4-AP**, or **4-MetAP** were synthesized by conducting mechanochemistry experiments using an FTS1000 Ball Mill purchased from Form-Tech Scientific. Experiments were conducted in 15 mL stainless steel jars with 10 mm stainless steel grinding balls. A 1:1 molar ratio of **BEZA** and the acceptor was combined with 4 drops of the organic solvent used in the respective crystallization experiments (see above). The reagents were placed in a stainless steel SmartSnap jar, and the mixture was milled at 900 rpm for a period of 1 hr. The resulting solids were characterized by powder X-ray diffraction.

1. **X-ray Diffraction Information and Data Tables**

X-ray data for **BEZA**·**2-AP**, **BEZA**·**2-AP**·EtOAc, **BEZA**·**3-AP**, **BEZA**·**4-AP** and **BEZA**·**4-MetAP** were collected using a Bruker PLATFORM three circle diffractometer equipped with an APEX II CCD detector and operated at 1350 W (45kV, 30 mA) to generate (graphite monochromated) MoKα radiation (λ = 0.71073 Å). The crystal sample in oil was mounted on a MiTiGen cryoloop and kept under a cold nitrogen stream at 100 K throughout the experiment. Intensity data were corrected for Lorentz, polarization, and background effects using the Bruker program APEX 3. A semi-empirical correction for adsorption was applied using the program *SADABS*1. The *SHELXL-2014*2 series of programs was used for the solution and refinement of the crystal structure. Hydrogen atoms bound to carbon, nitrogen, and oxygen atoms were located in the difference Fourier map and were geometrically constrained using the appropriate AFIX commands.

**Table S1.**  X-ray data for **BEZA**·**2-AP**, **BEZA**·**2-AP**·EtOAc,and **BEZA**·**3-AP**.

| compound name | **BEZA**·**2-AP** | **BEZA**·**2-AP**·EtOAc | **BEZA**·**3-AP** |
| --- | --- | --- | --- |
| chemical formula | C24H26ClN3O4 | C28H34ClN3O6 | C43H46Cl2N4O8 |
| formula mass | 455.93 | 573.60 | 817.74 |
| crystal system | Triclinic | Triclinic | Orthorhombic |
| space group | P | P | *Pbcn* |
| a/Å | 11.1015(13) | 10.286(3) | 10.2913(13) |
| b/Å | 11.2524(13) | 10.464(3) | 9.8204(12) |
| c/Å | 18.437(5) | 13.352(4) | 40.354(5) |
| α/° | 89.677(2) | 98.700(10) | 90 |
| β/° | 80.510(2) | 98.177(5) | 90 |
| γ/° | 83.614(2) | 100.379(6) | 90 |
| V/Å3 | 2257.3(5) | 137.9(7) | 4078.3(9) |
| Ρcalc/g cm-3 | 1.342 | 1.313 | 1.332 |
| T/K | 100(2) | 100(2) | 100(2) |
| Z | 4 | 2 | 4 |
| radiation type | MoKα | MoKα | MoKα |
| absorption coefficient, μ/mm-1 | 0.205 | 0.185 | 0.218 |
| no. of reflections measured | 45531 | 15664 | 44984 |
| no. of independent reflections | 8276 | 6112 | 4555 |
| no. of reflection (I>2σ(I)) | 6196 | 4854 | 4037 |
| Rint | 0.0539 | 0.0303 | 0.0414 |
| R1 ((I>2σ(I)) | 0.0475 | 0.0460 | 0.0384 |
| wR(F2) (I>2σ(I)) | 0.1006 | 0.1190 | 0.0867 |
| R1 (all data) | 0.0704 | 0.0603 | 0.0449 |
| wR(F2) (all data) | 0.1109 | 0.1279 | 0.0902 |
| Goodness-of-fit | 1.047 | 1.056 | 1.086 |
| CCDC deposition number | 1907839 | 1907840 | 1907841 |

**Table S2.** X-ray data for **BEZA**·**4-AP** and **BEZA**·**4-MetAP**·H2O.

| compound name | **BEZA**·**4-AP** | **BEZA**·**4-MetAP**·H2O |
| --- | --- | --- |
| chemical formula | C43H46Cl2N4O8 | C25H30ClN3O5 |
| formula mass | 817.74 | 486.95 |
| crystal system | Orthorhombic | Monoclinic |
| space group | *Pbcn* | *Pc* |
| a/Å | 10.2732(11) | 6.5937(19) |
| b/Å | 9.8443(11) | 19.100(5) |
| c/Å | 40.560(5) | 9.913(3) |
| α/° | 90 | 90 |
| β/° | 90 | 91.923(4) |
| γ/° | 90 | 90 |
| V/Å3 | 4102.0(8) | 1247.8(6) |
| Ρcalc/g cm-3 | 1.324 | 1.299 |
| T/K | 100(2) | 100(2) |
| Z | 4 | 2 |
| radiation type | MoKα | MoKα |
| absorption coefficient, μ/mm-1 | 0.216 | 0.193 |
| no. of reflections measured | 69903 | 11368 |
| no. of independent reflections | 3783 | 4535 |
| no. of reflection (I>2σ(I)) | 2869 | 3584 |
| Rint | 0.1072 | 0.0653 |
| R1 ((I>2σ(I)) | 0.0526 | 0.0479 |
| wR(F2) (I>2σ(I)) | 0.1101 | 0.0973 |
| R1 (all data) | 0.0784 | 0.0695 |
| wR(F2) (all data) | 0.1229 | 0.1071 |
| Goodness-of-fit | 1.151 | 0.998 |
| CCDC deposition number | 1907842 | 1907843 |

1. **Single-Crystal Structures Showing Thermal Ellipsoids**

For thermal ellipsoids structures, carbon, hydrogen, oxygen, nitrogen, and chlorine atoms are represented by gray, white, red, light blue, and light green ellipsoids, respectively.

**Figure S1**. Asymmetric unit of **BEZA**·**2-AP** with thermal ellipsoids plotted at 50% probability.

**Figure S2**. Abbreviated hydrogen-bonded assembly of **BEZA**·**2-AP**·EtOAcwith thermal ellipsoids plotted at 50% probability. The EtOAc molecule is omitted for clarity.

**Figure S3**. 1D hydrogen-bonded chain of **BEZA**·**3-AP** with thermal ellipsoids plotted at 50% probability.

**Figure S4**. 1D hydrogen-bonded chain of **BEZA**·**4-AP** with thermal ellipsoids plotted at 50% probability.

**Figure S5**. 1D hydrogen-bonded chain of **BEZA**·**4-MetAP**·H2O with thermal ellipsoids plotted at 50% probability.

1. **NMR Spectra of the Crystals**

Single crystals from the crystallization experiments were removed from the vial and dissolved in CDCl3 for NMR experiments. NMR spectra were collected using a JOEL ECS 400 MHZ Spectrometer with multinuclear, direct and inverse detection probes, automatic sample changer, variable temperature, and Z-gradient capabilities. The instrument was purchased with funds granted from National Science Foundation, grant number CHE-1048553.

**Figure S6**. 1H NMR spectrum of **BEZA**.

**Figure S7**. 1H NMR spectrum of **BEZA**·**2-AP**.

**Figure S8.** 1H NMR spectrum of **BEZA**·**2-AP**·EtOAc.

**Figure S9.** 1H NMR spectrum of **BEZA**·**3-AP**.

**Figure S10.** 1H NMR spectrum of **BEZA**·**4-AP**. The nitromethane signal is from the crystallization solvent.

**Figure S11.** 1H NMR spectrum of **BEZA**·**4-MetAP**.

1. **FT-IR** **Spectra**

FT-IR spectra were recorded on a Nicolet iS10 infrared spectrometer using an ATR attachment equipped with a diamond crystal.

**Figure S12**. Full FT-IR spectrum of **BEZA**.

**Figure S13**. FT-IR spectrum of **BEZA** with inset of carbonyl region.

**Figure S14**. FullFT-IR spectrum of **BEZA**·**2-AP**.

**Figure S15**. FT-IR spectrum of **BEZA**·**2-AP** with inset of carbonyl region.

**Figure S16**. Full FT-IR spectrum of **BEZA**·**2-AP**·EtOAc.

**Figure S17**. FT-IR spectrum of **BEZA**·**2-AP**·EtOAc with inset of carbonyl region.

**Figure S18**. Full FT-IR spectrum of **BEZA**·**3-AP**.

**Figure S19**. FT-IR spectrum of **BEZA**·**3-AP** with inset of carbonyl region.

**Figure S20**. FullFT-IR spectrum of **BEZA**·**4-AP**.

**Figure S21**.FT-IR spectrum of **BEZA**·**4-AP** with inset of carbonyl region.

**Figure S22**.Full FT-IR spectrum of **BEZA**·**4-MetAP**.

**Figure S23**.FT-IR spectrum of **BEZA**·**4-MetAP** with inset of carbonyl region.

1. **Powder X-ray Diffraction Data**

The diffraction pattern for each sample was collected on a Rigaku MiniFlex II powder diffractometer.  The X-ray diffraction pattern was obtained by scanning a 2θ range of 5-50°, step size = 0.02°, and scan time of 1.6 min/degree. The X-ray source was Cu Kα radiation (λ =1.5418 Å) with an anode voltage of 40 kV and a current of 15 mA. The beam was then discriminated by Rigaku's Bragg-Brentano geometry. Diffraction intensities were recorded on a D/teX Ultra position sensitive detector. The sample was prepared as a standard powder mount, and the diffractogram was processed through the software JADE v9.1.

**Figure S24.** PXRD patterns for **BEZA**·**2-AP**: predicted, solution grown crystals, and crystals synthesized by liquid-assisted milling.

**Figure S25.** PXRD patterns for **BEZA**·**2-AP**·**EtOAc**: predicted, solution grown crystals, and crystals synthesized by liquid-assisted milling.

**Figure S26.** PXRD patterns for **BEZA**·**3-AP**: predicted, solution grown crystals, and crystals synthesized by liquid-assisted milling.

**Figure S27.** PXRD patterns for **BEZA**·**4-AP**: predicted, solution grown crystals, and crystals synthesized by liquid-assisted milling.

**Figure S28.** PXRD patterns for **BEZA**·**4-MetAP**: predicted, solution grown crystals, and crystals synthesized by liquid-assisted milling.

**Figure S29.** PXRD patterns for **BEZA**·**4-AP**: predicted and crystals synthesized by milling in the absence of solvent.

1. **Melting Points of the Crystals**

Melting points were determined using a DigiMelt melting point system.

**Table S3.**  Melting point range for each crystal.

| **Crystal** | **Melting Point Range °C** |
| --- | --- |
| BEZA·2-AP | 148.9-150.0 |
| BEZA·2-AP·EtOAc | 151.9-153.0 |
| BEZA·3-AP | 137.0-138.8 |
| BEZA·4-AP | 156.0-157.5 |
| BEZA·4-MetAP | 142.0-143.7 |

**References**

1. Krause *et al.*, (2015) SADABS v 2016/2.

2. G. M. Sheldrick *Acta Crystallogr., Sect. C: Cryst. Struct. Commun*., 2015, **C71**, 3-8.
